# Supplementary material for: Stability-Indicating High-Performance Liquid Chromatographic Determination of Levamisole Hydrochloride in Bulk and Dosage Forms
Source: Hindawi journal article supplement (doi:10.1155/2020/6137897), 2020-10-09
Supplement: f1 [file 6137897.f1.docx]

**Supplementary materials:**

0.0

2.5

5.0

7.5

10.0

12.5

15.0

17.5

Min

0.0

2.5

5.0

mV

Detector A:215 nm

3.202

S1: Typical chromatogram for drug using ACN: ammonium phosphate buffer pH 7.2 (30:70%v/v) using C18 and methanol 60%v/v as diluent.


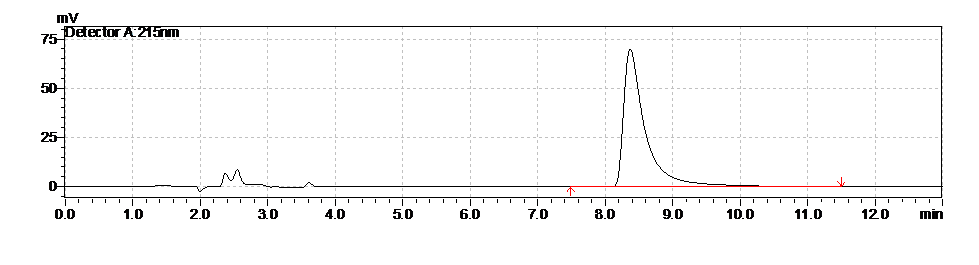


S2: Typical chromatogram for drug using ACN: KH2PO4buffer pH7.2 (30: 70 v/v), C18 column

0.0

2.5

5.0

7.5

10.0

12.5

15.0

17.5

min

0

500

1000

mV

Detector A:215nm

17516036

**S3: Typical chromatogram for drug using ACN: KH2PO4 pH 8.0 (30:70V/V) C18 column**

0.0

1.0

2.0

3.0

4.0

5.0

6.0

7.0

8.0

9.0

min

0

1000

2000

mV

Detector A: 215nm

17531097

S4: Typical chromatogram for drug using ACN: KH2PO4 pH 8 (40:60V/V), C18 column

0.0

1.0

2.0

3.0

4.0

5.0

6.0

7.0

8.0

9.0

10.0

11.0

min

Detector A:215nm

1578835

**S5: Typical chromatogram for drug using Methanol:** **KH2PO4 pH 8 (50:50V/V), C8 column**

S6: Calibration curves of the developed method

| **Dilution from solution A** | **Concentration**  **(µg/ml)** | **Peak Area in eluent A** | **Peak Area in eluent B** |
| --- | --- | --- | --- |
| 1/100 | 10 | 567166 | 568826 |
| 2/100 | 20 | 1114811 | 1134336 |
| 3/100 | 30 | 1669894 | 1704581 |
| 4/100 | 40 | 2232561 | 2271614 |
| 5/100 | 50 | 2778823 | 2829853 |

S7: Repeatability of the developed method

| **Dosage form** | **Mobile phase** | **Mean%(n=6)** | **SD** | **RSD** |
| --- | --- | --- | --- | --- |
| Injection | Eluent A | 95.41 | 1.49 | 1.28 |
| Oral solution | Eluent A | 98.70 | 0.901 | 0.919 |

**S8: Intermediate precision results for levamisole injection and oral solution**

|  | **Injection** | **Oral solution** |
| --- | --- | --- |
| Content analyst 1 | 95.5 | 98.7 |
| Content analyst 2 | 96.1 | 97.5 |
| Average | 95.8 | 98.1 |
| SD | 0.52 | 0.84 |
| RSD | 0.54 | 0.86 |
